# Supplementary material
Source: Springer Nature journal article supplement (https://www.springermedizin.de/resource/supplementary/12913_2010_1624_MOESM1_ESM.PDF/9528582)
Supplement: MOESM1 [file 9528582]

### Additional File 1: The CRU Scale

On your LAST typical work day on Unit \_\_\_\_\_, how often did best practice knowledge about things like pain management, preventing falls, and managing difficult behaviors do any of the following?

|                                                                             | Never                      | Rarely                     | Occasionally               | Frequently                 | Almost Always              |
|-----------------------------------------------------------------------------|----------------------------|----------------------------|----------------------------|----------------------------|----------------------------|
| 1. Give you new knowledge or information about how to care for residents.   | <input type="checkbox"/> 1 | <input type="checkbox"/> 2 | <input type="checkbox"/> 3 | <input type="checkbox"/> 4 | <input type="checkbox"/> 5 |
| 2. Raise your awareness about new ways to care for residents.               | <input type="checkbox"/> 1 | <input type="checkbox"/> 2 | <input type="checkbox"/> 3 | <input type="checkbox"/> 4 | <input type="checkbox"/> 5 |
| 3. Help to change your mind about how to care for residents.                | <input type="checkbox"/> 1 | <input type="checkbox"/> 2 | <input type="checkbox"/> 3 | <input type="checkbox"/> 4 | <input type="checkbox"/> 5 |
| 4. Give you new ideas about how to care for residents.                      | <input type="checkbox"/> 1 | <input type="checkbox"/> 2 | <input type="checkbox"/> 3 | <input type="checkbox"/> 4 | <input type="checkbox"/> 5 |
| 5. Help you make sense of things you have been doing to care for residents. | <input type="checkbox"/> 1 | <input type="checkbox"/> 2 | <input type="checkbox"/> 3 | <input type="checkbox"/> 4 | <input type="checkbox"/> 5 |

**This scale cannot be reproduced or used without written permission of the first two authors of this paper.**
